# Supplementary material for: Radioiodinated Exendin-4 Is Superior to the Radiometal-Labelled Glucagon-Like Peptide-1 Receptor Probes Overcoming Their High Kidney Uptake
Source: PubMed Central journal article supplement (PMC5245897; doi:10.1371/journal.pone.0170435), 2017-01-19

**S1 Fig. Analytical HPLC chromatogram of [Nle<sup>14</sup>, <sup>125</sup>I-Tyr<sup>40</sup>-NH<sub>2</sub>]Ex-4 without (A) and with co-injection of cold reference [Nle<sup>14</sup>, <sup>127</sup>I-Tyr<sup>40</sup>-NH<sub>2</sub>]Ex-4 (B). UV-and radio-detectors were in series, resulting in a lag time of about 15 sec for the radiotrace. Numbers in the chromatograms refer to peak retention time in minutes.**

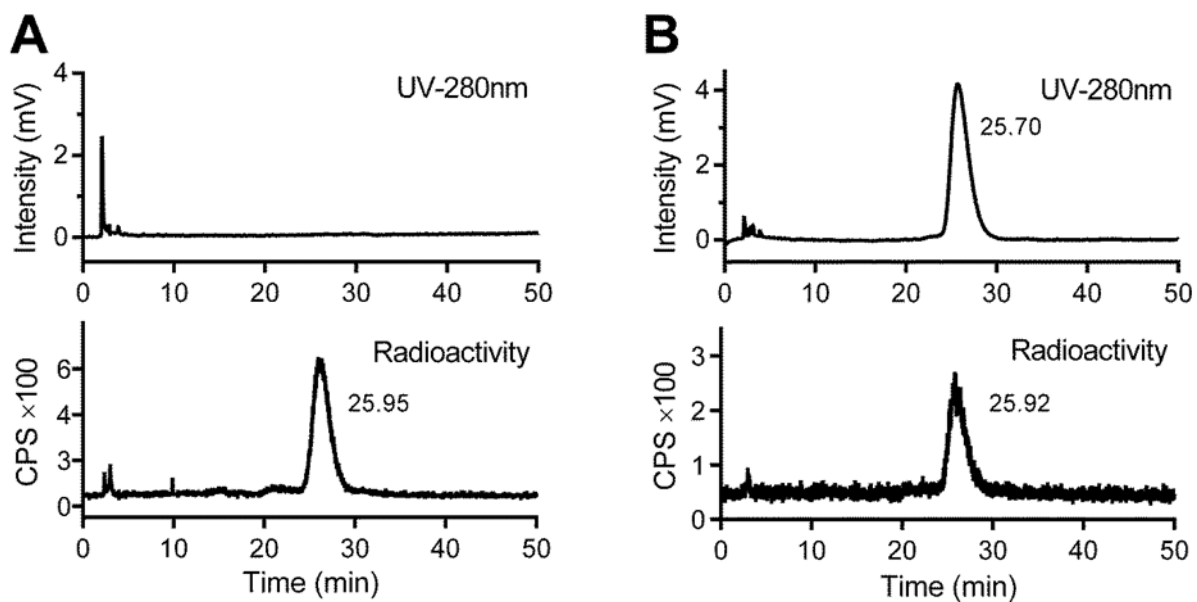

Supplement: pone.0170435.s001.pdf [file pone.0170435.s001.pdf]
