# Supplementary material for: Radioiodinated Exendin-4 Is Superior to the Radiometal-Labelled Glucagon-Like Peptide-1 Receptor Probes Overcoming Their High Kidney Uptake
Source: PubMed Central journal article supplement (PMC5245897; doi:10.1371/journal.pone.0170435), 2017-01-19

**S4 Fig. Analytical HPLC chromatograms from the urine of mice obtained at 1h (A) and 4h (B) post *iv* injection of [Nle<sup>14</sup>, <sup>124</sup>I-Tyr<sup>40</sup>-NH<sub>2</sub>]Ex-4. Note that apart from <sup>124</sup>I-iodide (peak at 2.38 min), neither the intact tracer (HPLC retention time ~23 min; see Fig. 3 in the main manuscript) nor other radioactive metabolites were found.**

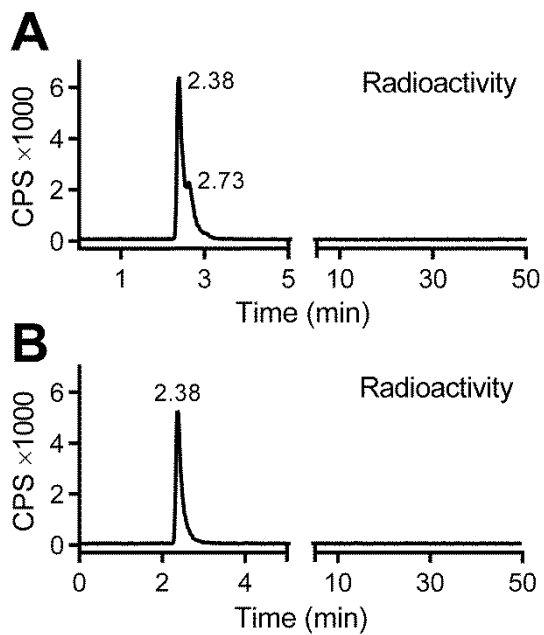

Supplement: pone.0170435.s004.pdf [file pone.0170435.s004.pdf]
