# Supplementary material for: Radioiodinated Exendin-4 Is Superior to the Radiometal-Labelled Glucagon-Like Peptide-1 Receptor Probes Overcoming Their High Kidney Uptake
Source: PubMed Central journal article supplement (PMC5245897; doi:10.1371/journal.pone.0170435), 2017-01-19
Supplement: pone.0170435.s005.pdf [file pone.0170435.s005.pdf]

## S 1 File. Analytical and semi-preparative HPLC.

Semi-preparative HPLC for purification of the nonradioactive peptides was performed on a Knauer Smartline 1000 HPLC system equipped with a VP250/21 Nucleosil 120-5 C18 column from Macherey-Nagel (Düren, Germany), mobile phase 42% acetonitrile/water (0.1% TFA), flow 12 mL/min, UV-detection at 280 nm. Quality control of [Nle<sup>14</sup>, <sup>124/125</sup>I-Tyr<sup>40</sup>-NH<sub>2</sub>]Ex-4 as well as the corresponding non-radioactive precursor and reference peptides was performed by analytical RP-HPLC on an identical system additionally equipped with a Ramona Star radioactivity detector (Raytest GmbH, Straubenhardt, Germany) using an EC250/4.6 Nucleosil 100-7 C2 column from Macherey-Nagel (Düren, Germany) with 33.5% acetonitrile/water (0.1% TFA) as mobile phase, flow 1.2 mL/min, UV-detection at 280 nm. Quality control of [Nle<sup>14</sup>, <sup>124/125</sup>I-Tyr<sup>40</sup>-NH<sub>2</sub>]Ex(9-39) as well as the corresponding non-radioactive precursor and reference peptides was performed by analytical RP-HPLC on an Agilent 1260 Infinity system equipped with an Agilent 1200 DAD UV-detector (UV detection at 280 nm) and a Ramona Star radioactivity detector (Raytest GmbH, Straubenhardt, Germany) using an EC250/4.6 Nucleosil 100-5 C18 column from Macherey-Nagel (Düren, Germany) and a gradient of 30-60% acetonitrile/water (0.1% TFA) in 25 min with a flow of 1.0 mL/min and UV-detection at 280 nm. Mass spectra were acquired on a Thermo Scientific Exactive mass spectrometer (ESI) and a Bruker Daltonics Ultraflex TOF/TOF (MALDI).
