# Supplementary material for: Radioiodinated Exendin-4 Is Superior to the Radiometal-Labelled Glucagon-Like Peptide-1 Receptor Probes Overcoming Their High Kidney Uptake
Source: PubMed Central journal article supplement (PMC5245897; doi:10.1371/journal.pone.0170435), 2017-01-19
Supplement: pone.0170435.s007.pdf [file pone.0170435.s007.pdf]

**S1 Table: Mass spectrometry data of peptides used in this study**

| <b>Compound</b>                                                                    | <b>Chem. Formula<br/>Exact mass</b>                                             | <b>Calculated m/z</b>                                              | <b>Measured m/z (ESI)</b>                                        |
|------------------------------------------------------------------------------------|---------------------------------------------------------------------------------|--------------------------------------------------------------------|------------------------------------------------------------------|
| [Nle <sup>14</sup> ,Tyr <sup>40</sup> -NH <sub>2</sub> ]Ex-4                       | C <sub>194</sub> H <sub>293</sub> N <sub>51</sub> O <sub>62</sub><br>4329.1342  | 2165.5744 [M+2H] <sup>2+</sup> ,<br>1444.0520 [M+3H] <sup>3+</sup> | 2165.5986 [M+2H] <sup>2+</sup><br>1444.0602 [M+3H] <sup>3+</sup> |
| [Nle <sup>14</sup> , <sup>127</sup> I-Tyr <sup>40</sup> -NH <sub>2</sub> ]Ex-4     | C <sub>194</sub> H <sub>292</sub> IN <sub>51</sub> O <sub>62</sub><br>4455.0309 | 4456.04 [M+H] <sup>+</sup>                                         | 4456.62 [M+H] <sup>+</sup><br>(MALDI-MS)                         |
| [Nle <sup>14</sup> ,Tyr <sup>40</sup> -NH <sub>2</sub> ]Ex(9-39)                   | C <sub>159</sub> H <sub>245</sub> N <sub>41</sub> O <sub>49</sub><br>3512.7940  | 1757.4043 [M+2H] <sup>2+</sup><br>1171.9386 [M+3H] <sup>3+</sup>   | 1757.4082 [M+2H] <sup>2+</sup><br>1171.9402 [M+3H] <sup>3+</sup> |
| [Nle <sup>14</sup> , <sup>127</sup> I-Tyr <sup>40</sup> -NH <sub>2</sub> ]Ex(9-39) | C <sub>159</sub> H <sub>244</sub> IN <sub>41</sub> O <sub>49</sub><br>3638.6906 | 1820.3526 [M+2H] <sup>2+</sup><br>1213.9042 [M+3H] <sup>3+</sup>   | 1820.3547 [M+2H] <sup>2+</sup><br>1213.9044 [M+3H] <sup>3+</sup> |
